# Supplementary material for: Stabilization of carbon dioxide (CO2) bubbles in micrometer-diameter aqueous droplets and the formation of hollow microparticles
Source: Royal Society of Chemistry journal article supplement (doi:10.1039/c6lc00242k), 2016-01-01
Supplement: c6lc00242k1.pdf [file c6lc00242k1.pdf]

## Supporting information

### Stabilization of carbon dioxide (CO<sub>2</sub>) bubbles in micrometer-diameter aqueous droplets and the formation of hollow microparticles

Tianyi Lu,<sup>a</sup> Rong Fan,<sup>a</sup> Luis Delgadillo<sup>b</sup> and Jiandi Wan<sup>\*a</sup>

**Table S1.** Calculation of the amount of CO<sub>2</sub> dissolved in aqueous drops with 2.5 wt% SDS.

| Parameters                                                                                                                                                                                                                                                            | Onset of generation                                                   | End of microfluidic channel | Collected outside the microfluidic channel |
|-----------------------------------------------------------------------------------------------------------------------------------------------------------------------------------------------------------------------------------------------------------------------|-----------------------------------------------------------------------|-----------------------------|--------------------------------------------|
| Volume of the aqueous drops (V <sub>aqueous</sub> , liter)*                                                                                                                                                                                                           | 3.49E-8                                                               |                             |                                            |
| Diameter of bubble (d) (μm)                                                                                                                                                                                                                                           | 416                                                                   | 265                         | 153                                        |
| Theoretically calculated the amount of CO <sub>2</sub> dissolved in aqueous drops based on Henry's Law (K <sub>H</sub> = 3.2×10 <sup>-4</sup> mol L <sup>-1</sup> kPa <sup>-1</sup> , P <sub>CO<sub>2</sub></sub> =8.96kPa)<br>N <sub>CO<sub>2</sub>-drop</sub> (mol) | 1.00E-10                                                              |                             |                                            |
| Experimentally observed the amount of CO <sub>2</sub> decreased in aqueous drops (density of CO <sub>2</sub> at 8.96kPa is 0.159 g/l) N <sub>CO<sub>2</sub>-bubble</sub> (mol)                                                                                        | 1.29E-10                                                              |                             |                                            |
|                                                                                                                                                                                                                                                                       | N <sub>CO<sub>2</sub>-bubble</sub> > N <sub>CO<sub>2</sub>-drop</sub> |                             |                                            |

\* Due to the irregular shape of the drops when they were generated in microfluidic channels, the volume of the drops was calculated based on the diameter of drops collected outside the channel.

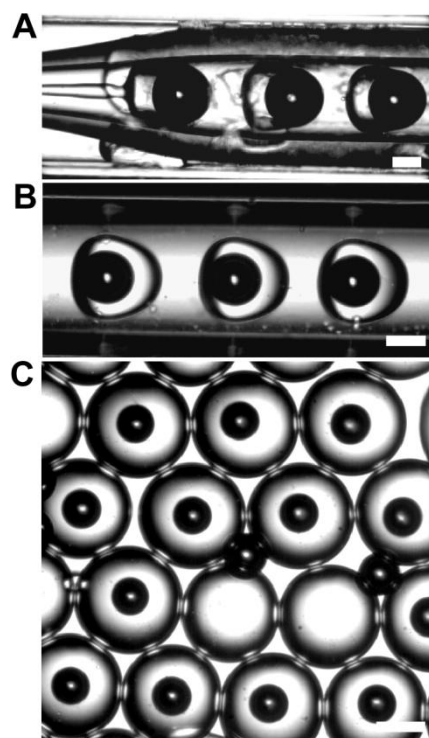

**Fig. S1** Microscopic images of the CO<sub>2</sub>-in-water-in-oil drops when they were (A) generated at the orifice of the microfluidic device, and (B) flowing near the end of microfluidic device, and (C) collected outside the device. Note the change of the size of bubbles. The aqueous phase contains 2.5 wt% SDS and the PDMS oil phase contains 2 wt% 749. Scale bar: 200  $\mu$ m.

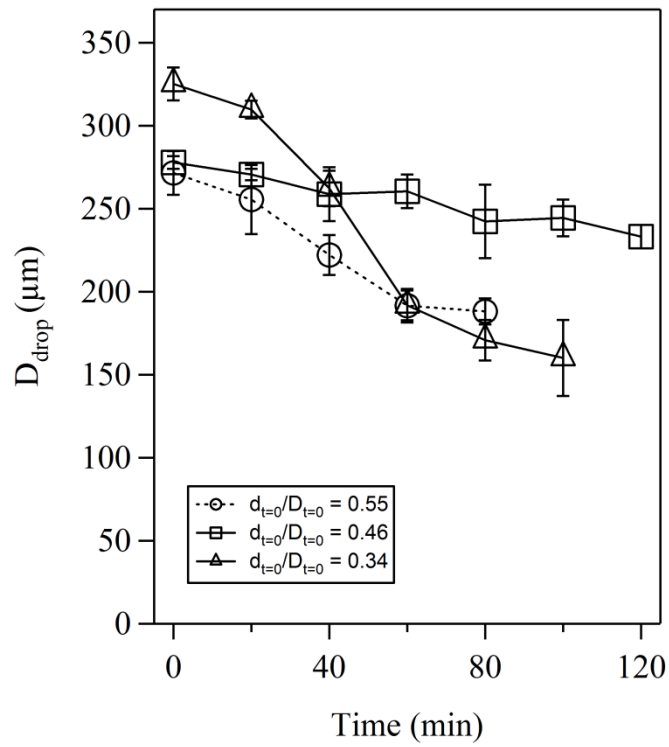

**Fig. S2** Change of the size of CO<sub>2</sub>-in-water-in-oil drops with evaporation time at different initial bubble-to-drop diameter ratios. The aqueous phase contains 2.5 wt% SDS and the PDMS oil phase contains 2 wt% 749.

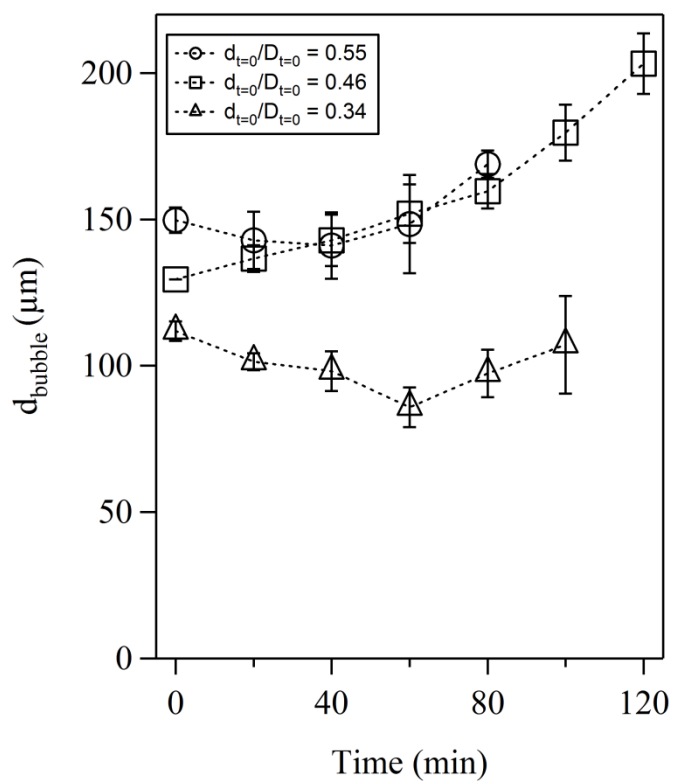

**Fig. S3** Change of the size of CO<sub>2</sub> bubbles encapsulated in aqueous drops with evaporation time at different initial bubble-to-drop diameter ratios. The aqueous phase contains 2.5 wt% SDS and the PDMS oil phase contains 2 wt% 749.

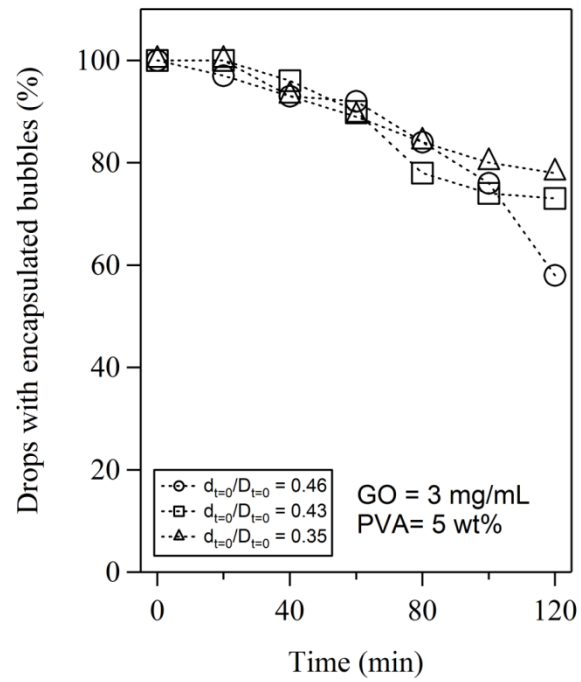

**Fig. S4** Change of percentages of CO<sub>2</sub>-containing drops with evaporation time in the presence of 3 mg/mL GO. The aqueous phase contains 1 wt% SDS and 5 wt% PVA, and the PDMS oil phase contains 2 wt% 749.

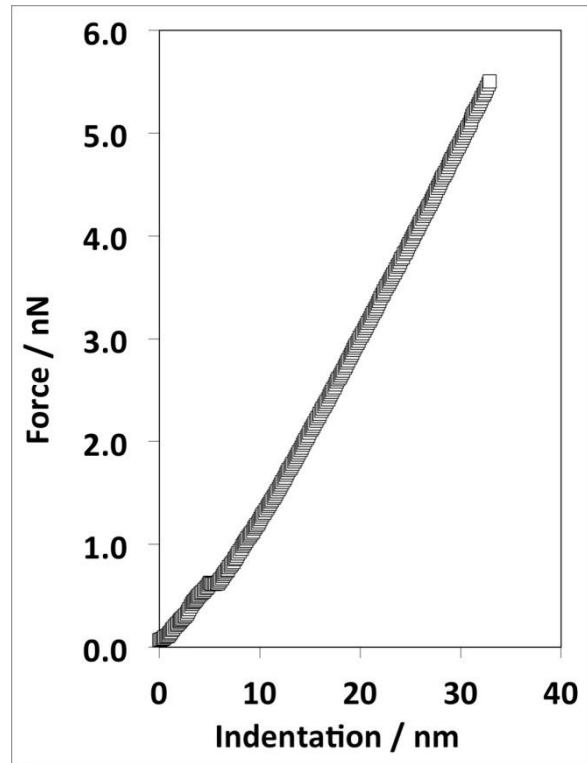

**Fig. S5** A typical force-distance curve of the hollow particles shown in Figure 3.
